# Supplementary material for: Systematic exploration of Escherichia coli phage-host interactions with the BASEL phage collection
Source: bioRxiv or medRxiv preprint supplement (doi:10.1101/2021.03.08.434280), 2021-03-15
Supplement: Supplementary file [file media-1.pdf]

## 1 **S1 Text. Construction of bacterial mutant strains**

2 Mutants strains of *Escherichia coli* were generally constructed using recombineering [1]. For this  
3 purpose, strain *E. coli* K-12 MG1655 (laboratory wildtype; CGSC #6300; see S1 Table) and derivatives or  
4 variants were transformed with one of several plasmids carrying the lambda red recombineering  
5 functions. In some cases, we used plasmid pWRG99 that encodes the lambda red recombineering  
6 functions as well as I-SceI for negative selection of the double-selectable chloramphenicol resistance  
7 cassette (of template plasmid pWRG100) carrying an I-SceI site (called *camR-I-SceI* in the following) [2].  
8 Alternatively, plasmid pKM208 was used [3]. A clean deletion or allelic exchange was achieved using a  
9 two-step procedure in which first a target locus was replaced by recombineering with a double-selectable  
10 cassette carrying an antibiotic resistance gene for positive selection (chloramphenicol or kanamycin  
11 resistance denoted as *camR* or *kanR*). Subsequently, the double-selectable cassette was replaced with the  
12 desired alternative allele or deletion allele using recombineering and negative selection marker against  
13 an I-SceI site or the *sacB* gene (conferring sucrose sensitivity) on the double-selectable cassette. As an  
14 alternative to pWRG100 encoding a *camR-I-SceI* double-selectable cassette, we sometimes used another  
15 double-selectable cassette (based on plasmid pJM05) encoding a kanamycin resistance cassette and *sacB*  
16 for negative selection (in the following called *kanR-sacB*) that we had already used earlier [4].  
17 Alternatively, a variant of plasmid pUA139 [5] carrying the *camR-sacB* double-selectable cassette of pKO4  
18 [6] – known as pUA139\_cat-sacB\_v3 – was used. This plasmid is a convenient PCR template for *sacB* either  
19 in combination with a kanamycin or chloramphenicol marker. For increased efficiency of recombineering  
20 in *E. coli* K-12 strains expressing functional EcoKI, we had initially edited out the EcoKI site in the  
21 chloramphenicol resistance cassette of pKO4.

## 22        **1) Construction of *Escherichia coli* K-12 MG1655 $\Delta$ RM**

23        All known strains of *E. coli* K-12 have long lost costly production of O-antigen glycan chains, the  
24        outermost part of the lipopolysaccharide (LPS) on the cell surface [7], which in other *E. coli* would  
25        effectively shield the receptors of many phages on the bacterial cell surface [8-10]. However, K-12 strains  
26        encode the well-known EcoKI type I RM system and three type IV restriction systems as well as the RexAB  
27        and PifA abortive infection systems (carried by the lambda prophage and the F-plasmid, respectively) [11,  
28        12]. In order to avoid an interference of these systems with phage isolation, we used the common  
29        MG1655 laboratory strain of *E. coli* K-12 (which had been cured of lambda prophage as well as F-plasmid  
30        long ago [13]), and additionally deleted the four restriction systems, creating strain *E. coli* K-12 MG1655  
31         $\Delta$ RM. Subsequently, we re-introduced the F-plasmid because its sex pilus can be used as a phage receptor,  
32        but used a variant on which we had deleted *pifA* (see *Materials and Methods* and below).

33        As a first step of in the construction of *E. coli* K-12 MG1655  $\Delta$ RM the parental strain *E. coli* K-12  
34        MG1655 was transformed with plasmid pWRG99. In order to delete type I restriction-modification (RM)  
35        system EcoKI and type IV restriction systems Mrr and mcrBC that are encoded close to each other, we  
36        amplified a *camR-I-SceI* with suitable 50 bp homologies using oligonucleotide primers prAH1815 /  
37        prAH1816 from template plasmid pWRG100 and recombineered this cassette into the chromosome of *E.*  
38        *coli* K-12 MG1655 to generate strain *E. coli* K-12 MG1655 *mrr-hsdRMS-mcrBC::DScas(I-SceI)*. For a clean  
39        deletion, we annealed complementary 80 nt oligonucleotides spanning the desired deletion site with 40  
40        nt on each side (prAH1817 / prAH1818) and subsequently recombineered the resulting double-stranded  
41        DNA molecule into *E. coli* K-12 MG1655 *mrr-hsdRMS-mcrBC::DScas(I-SceI)*. *E. coli* K-12 MG1655  $\Delta$ *mrr-*  
42        *hsdRMS-mcrBC* carrying pWRG99 was stocked as AH-E02-160. Note that the deletion also removes the  
43        *symER* type I toxin-antitoxin module that has no known biological function [14].

44 In order to delete the *mcrA* type IV restriction system in *E. coli* K-12 MG1655  $\Delta mrr$ -*hsdRMS*-*mcrBC*  
45 (AH-E02-160), we amplified a *kanR-sacB* doubleselectable cassette with suitable 50 bp homologies using  
46 oligonucleotide primers prAH1823 / prAH1825 from template plasmid pJM05 and recombineered this  
47 cassette into the chromosome of this strain to generate *E. coli* K-12 M1655  $\Delta mrr$ -*hsdRMS*-*mcrBC*  
48 *mcrA::DScas*. A clean deletion of *mcrA* was achieved as described above using recombineering with  
49 annealed 80 nt oligonucleotides prAH1826 / prAH1827 that span the desired deletion site, followed by  
50 the elimination of temperature-sensitive plasmid pWRG99 by growth at 43°C. The resulting strain *E. coli*  
51 K-12 M1655  $\Delta mrr$ -*hsdRMS*-*mcrBC*  $\Delta mcrA$  (called  $\Delta RM$  throughout our work) was stocked as AH-E03-200.

## 52 **2) Construction of plasmid F(*pifA::zeoR*)**

53 In order to knock out *pifA* on the F-plasmid of *E. coli* K-12 and at the same time introduce a  
54 selection marker onto this plasmid, the *pifA* gene was replaced with a zeocin resistance cassette by  
55 recombineering. For this purpose, *E. coli* K-12 W1872 (CGSC #6538) that carries a wildtype F-plasmid was  
56 transformed with recombineering plasmid pKM208 [3] and the zeocin resistance cassette (*zeoR* in short)  
57 was amplified from template plasmid pPICZa with suitable 50 bp homologies using oligonucleotide  
58 primers prAH1944 / prAH1945. The resulting strain *E. coli* K-12 W1872 F(*pifA::zeoR*) was mated with *E.*  
59 *coli* K-12 MG1655  $\Delta RM$  carrying pBR322\_  $\Delta Ptet$  by simply mixing small amounts of overnight cultures of  
60 both strains (washed once in LB medium to remove antibiotic supplements) in an Eppendorf tube and  
61 incubating the mixture at 37°C for three hours. Plating on LB agar plates containing 100  $\mu\text{g}/\text{ml}$  ampicillin  
62 and 50  $\mu\text{g}/\text{ml}$  zeocin enabled selection for *E. coli* K-12 MG1655  $\Delta RM$  carrying pBR322\_  $\Delta Ptet$  and  
63 F(*pifA::zeoR*) which was stocked as AH-E03-217. Successful transfer of F(*pifA::zeoR*) was verified by  
64 confirming sensitivity of AH-E03-217 to phages targeting the F sex pilus while retaining sensitivity to phage  
65 T7 (like *E. coli* K-12 W1872 F(*pifA::zeoR*), while the ancestral *E. coli* W1872 was resistant to phage T7).

66 **3) Construction of *Escherichia coli* K-12 MG1655  $\Delta$ RM mutants with altered surface**  
67 **glycans**

68 *waaC* and *waaG* were knocked out in the *E. coli* K-12 MG1655  $\Delta$ RM strain background using the  
69 pKD13-derived kanamycin resistance cassette (*kanR*) constructs of the KEIO collection [15]. The  
70 *waaC::kanR* and *waaG::kanR* constructs were amplified from the respective KEIO collection mutant strains  
71 using primer pairs prAH2015 / prAH2016 and prAH2019 / prAH2020, respectively. Subsequently, the  
72 cassettes were recombineered into *E. coli* K-12 MG1655  $\Delta$ RM carrying pWRG99. After eliminating  
73 temperature-sensitive plasmid pWRG99 by growth at 43°C, the resulting strains *E. coli* K-12 MG1655  $\Delta$ RM  
74 *waaC::kanR* and *E. coli*  $\Delta$ RM *waaG::kanR* were stocked as AH-E03-233 and AH-E03-235, respectively.

75 In order to remove the IS5 element disrupting the *wbbL* gene in *E. coli* K-12 MG1655  $\Delta$ RM carrying  
76 pWRG99, we first used recombineering to precisely replace it with the *kanR-sacB* cassette of pUA139\_cat-  
77 *sacB\_v3* that had been amplified with prAH2009 / prAH2010. Subsequently, we amplified part of the intact  
78 open reading frame of *wbbL* from plasmid pAR280 using prAH2013 / prAH2014 and used the PCR product  
79 to cut out the *kanR-sacB* cassette previously inserted at *wbbL*. After eliminating temperature-sensitive  
80 plasmid pWRG99 by growth at 43°C, the resulting strain *E. coli* K-12 MG1655  $\Delta$ RM *wbbL(+)* was stocked  
81 as AH-E04-243.

82 **4) Construction of *Escherichia coli* K-12 BW25113 *btuB::kanR* and *tolC::kanR* mutants**

83 The KEIO collection lacks a true *btuB* mutant strain [16], probably because the attempted deletion  
84 of *btuB* by recombineering apparently used homologies that affected functional expression of the  
85 essential *murl* gene [17, 18] which is encoded downstream of *btuB* with an overlap of almost 60 bp. We  
86 therefore selected alternative 50 bp homologies that would 1) remove the complete 5' end of *btuB*  
87 including the start codon and 2) leave the last ca. 300 bp at the 3' end of *btuB* intact in order to not abolish

88 *murl* expression. The *kanR* cassette of classical recombineering template plasmid pKD13 was amplified  
89 with these homologies using oligonucleotide primers prMBu0025 / prMBu0026 [19]. Subsequently, the  
90 PCR product was recombineered into *E. coli* K-12 BW25113 carrying pKM208. After curing temperature-  
91 sensitive plasmid pKM208 by growth at 43°C, the resulting strain *E. coli* K-12 BW25113 *btuB::kanR* was  
92 stocked as AH-E04-321.

93 The *E. coli* K-12 BW25113 *tolC::kanR* mutant included in our copy of the KEIO collection was  
94 unavailable due to apparent contamination of the frozen stock. We therefore amplified the generated a  
95 new *tolC::kanR* deletion mutant in which the full *tolC* open reading frame was replaced by the *kanR*  
96 cassette of pKD13. For this purpose, we amplified *kanR* with suitable 50 bp homologies using prMBu0075  
97 and prMBu0076. Subsequently, the PCR product was recombineered into *E. coli* K-12 BW25113 carrying  
98 pKM208. After curing temperature-sensitive plasmid pKM208 by growth at 43°C, the resulting strain *E.*  
99 *coli* K-12 BW25113 *tolC::kanR* was stocked as MBu-E01-044.

100

## 101 **References (S1 Text)**

- 102 1. Sharan SK, Thomason LC, Kuznetsov SG, Court DL. Recombineering: a homologous recombination-  
103 based method of genetic engineering. *Nat Protoc.* 2009;4(2):206-23. Epub 2009/01/31. doi:  
104 10.1038/nprot.2008.227. PubMed PMID: 19180090; PubMed Central PMCID: PMCPMC2790811.
- 105 2. Blank K, Hensel M, Gerlach RG. Rapid and highly efficient method for scarless mutagenesis within  
106 the *Salmonella enterica* chromosome. *PloS one.* 2011;6(1):e15763. doi: 10.1371/journal.pone.0015763.  
107 PubMed PMID: 21264289; PubMed Central PMCID: PMCPMC3021506.
- 108 3. Murphy KC, Campellone KG. Lambda Red-mediated recombinogenic engineering of  
109 enterohemorrhagic and enteropathogenic *E. coli*. *BMC Mol Biol.* 2003;4:11. doi: 10.1186/1471-2199-4-  
110 11. PubMed PMID: 14672541; PubMed Central PMCID: PMCPMC317293.
- 111 4. Harms A, Liesch M, Körner J, Quebatte M, Engel P, Dehio C. A bacterial toxin-antitoxin module is  
112 the origin of inter-bacterial and inter-kingdom effectors of *Bartonella*. *PLoS genetics.*  
113 2017;13(10):e1007077. doi: 10.1371/journal.pgen.1007077. PubMed PMID: 29073136.
- 114 5. Zaslaver A, Bren A, Ronen M, Itzkovitz S, Kikoin I, Shavit S, et al. A comprehensive library of  
115 fluorescent transcriptional reporters for *Escherichia coli*. *Nat Methods.* 2006;3(8):623-8. doi:  
116 10.1038/nmeth895. PubMed PMID: 16862137.

- 117 6. Lee EC, Yu D, Martinez de Velasco J, Tessarollo L, Swing DA, Court DL, et al. A highly efficient  
118 *Escherichia coli*-based chromosome engineering system adapted for recombinogenic targeting and  
119 subcloning of BAC DNA. *Genomics*. 2001;73(1):56-65. doi: 10.1006/geno.2000.6451. PubMed PMID:  
120 11352566.
- 121 7. Henderson JC, Zimmerman SM, Crofts AA, Boll JM, Kuhns LG, Herrera CM, et al. The Power of  
122 Asymmetry: Architecture and Assembly of the Gram-Negative Outer Membrane Lipid Bilayer. *Annu Rev*  
123 *Microbiol*. 2016;70:255-78. Epub 2016/07/01. doi: 10.1146/annurev-micro-102215-095308. PubMed  
124 PMID: 27359214.
- 125 8. Nobrega FL, Vlot M, de Jonge PA, Dreesens LL, Beaumont HJE, Lavigne R, et al. Targeting  
126 mechanisms of tailed bacteriophages. *Nature reviews Microbiology*. 2018;16(12):760-73. Epub  
127 2018/08/15. doi: 10.1038/s41579-018-0070-8. PubMed PMID: 30104690.
- 128 9. Letarov AV, Kulikov EE. Adsorption of Bacteriophages on Bacterial Cells. *Biochemistry (Mosc)*.  
129 2017;82(13):1632-58. Epub 2018/03/11. doi: 10.1134/S0006297917130053. PubMed PMID: 29523063.
- 130 10. Broecker NK, Barbirz S. Not a barrier but a key: How bacteriophages exploit host's O-antigen as an  
131 essential receptor to initiate infection. *Molecular microbiology*. 2017;105(3):353-7. Epub 2017/06/16. doi:  
132 10.1111/mmi.13729. PubMed PMID: 28618013.
- 133 11. Dy RL, Richter C, Salmond GP, Fineran PC. Remarkable Mechanisms in Microbes to Resist Phage  
134 Infections. *Annu Rev Virol*. 2014;1(1):307-31. doi: 10.1146/annurev-virology-031413-085500. PubMed  
135 PMID: 26958724.
- 136 12. Roberts RJ, Vincze T, Posfai J, Macelis D. REBASE--a database for DNA restriction and modification:  
137 enzymes, genes and genomes. *Nucleic acids research*. 2015;43(Database issue):D298-9. Epub 2014/11/08.  
138 doi: 10.1093/nar/gku1046. PubMed PMID: 25378308; PubMed Central PMCID: PMC4383893.
- 139 13. Blattner FR, Plunkett G, 3rd, Bloch CA, Perna NT, Burland V, Riley M, et al. The complete genome  
140 sequence of *Escherichia coli* K-12. *Science*. 1997;277(5331):1453-62. Epub 1997/09/05. doi:  
141 10.1126/science.277.5331.1453. PubMed PMID: 9278503.
- 142 14. Harms A, Brodersen DE, Mitarai N, Gerdes K. Toxins, Targets, and Triggers: An Overview of Toxin-  
143 Antitoxin Biology. *Molecular cell*. 2018;70(5):768-84. doi: 10.1016/j.molcel.2018.01.003. PubMed PMID:  
144 29398446.
- 145 15. Baba T, Ara T, Hasegawa M, Takai Y, Okumura Y, Baba M, et al. Construction of *Escherichia coli* K-  
146 12 in-frame, single-gene knockout mutants: the Keio collection. *Mol Syst Biol*. 2006;2:2006 0008. doi:  
147 10.1038/msb4100050. PubMed PMID: 16738554; PubMed Central PMCID: PMC1681482.
- 148 16. Yamamoto N, Nakahigashi K, Nakamichi T, Yoshino M, Takai Y, Touda Y, et al. Update on the Keio  
149 collection of *Escherichia coli* single-gene deletion mutants. *Mol Syst Biol*. 2009;5:335. Epub 2009/12/24.  
150 doi: 10.1038/msb.2009.92. PubMed PMID: 20029369; PubMed Central PMCID: PMC2824493.
- 151 17. Goodall ECA, Robinson A, Johnston IG, Jabbari S, Turner KA, Cunningham AF, et al. The Essential  
152 Genome of *Escherichia coli* K-12. *MBio*. 2018;9(1). Epub 2018/02/22. doi: 10.1128/mBio.02096-17.  
153 PubMed PMID: 29463657; PubMed Central PMCID: PMC5821084.
- 154 18. Rousset F, Cui L, Siouve E, Becavin C, Depardieu F, Bikard D. Genome-wide CRISPR-dCas9 screens  
155 in *E. coli* identify essential genes and phage host factors. *PLoS genetics*. 2018;14(11):e1007749. Epub  
156 2018/11/08. doi: 10.1371/journal.pgen.1007749. PubMed PMID: 30403660; PubMed Central PMCID:  
157 PMC6242692.
- 158 19. Datsenko KA, Wanner BL. One-step inactivation of chromosomal genes in *Escherichia coli* K-12  
159 using PCR products. *Proc Natl Acad Sci USA*. 2000;97(12):6640-5. doi: 10.1073/pnas.120163297. PubMed  
160 PMID: 10829079; PubMed Central PMCID: PMC18686.
