# Supplementary material for: Systematic exploration of Escherichia coli phage-host interactions with the BASEL phage collection
Source: bioRxiv or medRxiv preprint supplement (doi:10.1101/2021.03.08.434280), 2021-03-15
Supplement: Supplementary file [file media-3.pdf]

# 1 **S3 Text. Technical considerations regarding the composition of the** 2 **BASEL collection and the phenotyping of bacterial defense systems**

## 3 **Considerations regarding the composition of the BASEL collection**

4           The choice of isolation host is known to be “perhaps the most critical part of the isolation process”  
5 because it pre-determines the properties and range of phages that can be sampled [1]. We therefore  
6 specifically designed a highly phage-sensitive host strain, *Escherichia coli* K-12  $\Delta$ RM, in order to eliminate  
7 as many biases in the isolation process as possible (see *Materials and Methods* as well as *Composition of*  
8 *the BASEL collection* in the main text).

9           However, one important feature of *E. coli* K-12  $\Delta$ RM is that it displays the rough LPS of all K12-  
10 lineage laboratory strains and lacks the O-antigen chains that are otherwise fully covering the cell surface  
11 of natural enterobacterial isolates (Figs 3A and 12A) [2]. On one hand, the absence of this formidable  
12 barrier enabled the isolation of a huge diversity of phages from all families that are, with very few  
13 exceptions, largely unable to infect *E. coli* K-12 with restored O16-type O-antigen expression (Figs 3A, 4,  
14 and 6-11). However, using a strain with rough LPS as isolation host intrinsically excludes any phages for  
15 which the O-antigen is not only an optional primary receptor but an essential part of the host recognition.  
16 Two common examples for such phages are iconic *Salmonella* phage P22 and *Gamaleyavirus* G7C, a  
17 relative of N4 (see Fig 10E), that both bind to very specific types of O-antigen and then target the glycan  
18 chain by enzymatic activities of their tailspikes to generate directional movement towards the cell surface  
19 [3, 4]. It is clear that this kind of phages are not highly abundant among *E. coli* phages because, e.g., a  
20 study that had isolated fifty phages primarily using strains with smooth LPS found 1) mostly the same  
21 taxonomic groups as those in the BASEL collection and reported that 2) many phages isolated on smooth  
22 hosts can also infect *E. coli* K-12 [5]. However, the targeting of O-antigen chains as an essential primary

23 receptor is not uncommon among podoviruses (and some myoviruses) [6, 7], and the isolation of *E. coli*  
24 phages with hosts expressing full smooth LPS indeed revealed a bigger diversity of (narrow-host-range)  
25 podoviruses than was reported in studies solely relying on *E. coli* K-12 [5]. Given seemingly low abundance  
26 of O-antigen specialists and that most realistic applications of the BASEL collection will be based on  
27 infecting *E. coli* K-12 strains with rough LPS, we do not feel that the absence of these O-antigen-dependent  
28 phages compromises the usefulness of our work. However, we imagine that a future study could generate  
29 a dedicated, optional expansion of the BASEL collection containing a diverse and representative selection  
30 of these phages that are specialized in the O16-type O-antigen of *E. coli* K-12. Similarly, we excluded all  
31 tailless phages like *Microviridae* and *Inoviridae* from the BASEL collection because their biology, evolution,  
32 and host interactions are so different from the lytic *Caudovirales* that we feel their investigation is beyond  
33 the scope of our current work [8, 9].

34 Any bacteriophage collection of finite size is inherently unable to include all rare phage groups  
35 and cannot comprehensively cover all genera of highly diverse and abundant families such as the  
36 *Drexlerviridae* (Fig 4B). Despite this shortcoming, we feel that the BASEL collection provides a reasonably  
37 complete snapshot of *E. coli* phage diversity because, e.g., all common and almost all previously described  
38 protein receptors of all included phage groups are covered (Figs 4-8). Increasing the number of phage  
39 isolates in the BASEL collection might therefore not greatly increase its biological diversity but could  
40 jeopardize its usefulness by making the handling more complicated. It also does not appear that sampling  
41 most phages from sewage plant inflow is a major limitation, because we did not observe any difference  
42 in the phages sampled from sewage and, e.g., river water (S5 Table). Previous work had sampled overall  
43 similar sets of phage groups on matter if the phages came from sewage or from infant guts [5, 10-15],  
44 possibly because many *E. coli* phages in the environment might derive directly or indirectly from fecal  
45 contaminations.

46 Another limitation of our isolation host strain *E. coli* K-12  $\Delta$ RM is that it might introduce additional  
47 biases beyond its rough LPS phenotype. As an example, laboratory adaptation might have inactivated also  
48 other possible phage receptors on the cell surface. A relevant example for the possible consequences of  
49 such a bias is the observation that phage T5 of the T phages is a highly unusual member of the  
50 *Markadamsvirinae* subfamily of *Demerecviridae* because it uses the FhuA protein as its terminal receptor  
51 (Fig 7) [16]. This peculiar feature of the T phages is easily explained with the *btuB* loss-of-function mutation  
52 of many early *E. coli* B strains that were used to sample the T phages but later reverted back to functional  
53 BtuB expression, e.g., in the lineage leading to *E. coli* B REL606 that is sensitive to all tested  
54 *Markadamsvirinae* (Fig 12B) [16, 17]. Similarly, the T phages do not contain any *Vequintavirinae* phage  
55 despite the abundance of this group, and we indeed find that none of our twelve *Vequintavirinae sensu*  
56 *stricto* can lyse *E. coli* B REL606 (Fig 12B). Since this defect is probably due to impaired adsorption, we  
57 speculate that the truncated *E. coli* B LPS core and / or changes of the ECA or any other primary receptor  
58 might be responsible for this surprising phenotype.

59 Another possible factor biasing the diversity of isolated bacteriophages could be remaining  
60 immunity systems in the sampling strain *E. coli* K-12  $\Delta$ RM. While we strain lacks all known restriction  
61 systems of *E. coli* K-12 as well as the RexAB and PifA Abi systems (S1 Text), several systems remain that  
62 either have been poorly studied or are supposed to have only a narrow target range [18]. As an example,  
63 the cryptic prophage *e14* of *E. coli* K-12 encodes the Lit Abi system that cleaves the elongation factor Tu  
64 (EF-Tu) when sensing the major capsid protein of *Tevenvirinae* [18, 19]. It is intuitive that the presence of  
65 *lit* in *E. coli* K-12  $\Delta$ RM might somehow bias the range of *Tevenvirinae* phages that we are sampling.  
66 However, although we confirmed by whole-genome sequencing that both the host as well as the T4 phage  
67 should carry alleles of *lit* and the major capsid protein gene triggering abortive infection [19], we observe  
68 robust plaque formation of T4 on our *E. coli* K-12 strains (see, e.g., in S4B Fig). Similarly, recent work

69 growing phage T4 on *E. coli* K-12 hosts never reported any problems with abortive infection [5, 20, 21].  
70 We are therefore skeptical if abortive infection by *lit* can significantly affect the isolation of bacteriophages  
71 with *E. coli* K-12  $\Delta$ RM. Besides Lit, the RnlAB type II toxin-antitoxin system aborts the growth of T4 by  
72 activation of the RnIA RNase toxin when the phage lacks the *dmd* antitoxin gene [18, 22]. However, given  
73 the broad conservation of *dmd* among *Tevenvirinae* and the absence of any reports that RnlAB could  
74 target different phages, we do not think that this system has a significant impact on our bacteriophage  
75 isolation experiments. Like for Lit and RnlAB, we see no evidence that the other proposed immunity  
76 systems of *E. coli* K-12 will have relevant impact on the diversity of sampled phages. These are mostly ill-  
77 characterized or, in case of DicB, were only shown to work when ectopically expressed [23].

## 78 **Considerations regarding the phenotyping of bacterial immunity systems**

79 Our phage phenotyping experiments with diverse immunity systems were performed as  
80 quantitative top agar assays to determine the efficiency of plating (EOP) of each phage on a host carrying  
81 a given immunity system to generate robust, quantitative data (see *Materials and Methods*). However,  
82 there are a few technical caveats associated with our approach that need to be considered for a  
83 comprehensive interpretation of our results. Most importantly, for the phenotyping in the *E. coli* K-12  
84  $\Delta$ RM host we cloned the different immunity systems onto plasmids which, though most were cloned with  
85 their native promoter, might affect their functionality by change of copy number (see *Materials and*  
86 *Methods* as well as S3 and S4 Tables). As an example, it was shown that phage T4 wildtype is resistant to  
87 RexAB but becomes sensitive when this immunity system is overexpressed from a multicopy plasmid [24].  
88 However, the ColE1 and SC101 origins of replications used in this study have rather low copy numbers (of  
89 around 40 and 3-4, respectively [25]) and, e.g., our *rexAB* construct with ColE1 origin of replication has no  
90 detectable effect on the growth of phage T4 or any relative (Fig 8C), while an *rIIAB* mutant of this phage  
91 was sensitive as described previously (S4B and S4C Figs) [18]. The use of two different origins of replication

92 is a consequence of our initial choice to clone immunity systems onto plasmids isogenic to the EcoRI and  
93 EcoRV plasmids of Pleška, Qian et al. [26] which later resulted in problems with toxicity for some  
94 constructs. These were then cloned into the lower-copy plasmid with SC101 origin of replication instead  
95 (S4 Table). Though it is clear that expression levels could be different between these backbones as already  
96 evidenced from the difference in toxicity, we do not feel that this compromises our approach considerably.  
97 As an example, the two type III RM systems EcoP1\_I and EcoCFT\_II have a similar recognition sequence  
98 (Fig 3B) that is similarly abundant in the diverse phage genomes (S5 Table), but EcoP\_1 was cloned with  
99 an SC101 origin of replication while EcoCFT\_II was cloned with a ColE1 origin of replication. However, the  
100 phenotyping data do not show EcoCFT\_II would be more potent compared to EcoP1\_I (Figs 4 and 6-11) –  
101 sometimes one or the other has the stronger effect on EOP, sometimes they are similar.

102 Another more transparent caveat is that the graphs displaying the EOP of different phages on  
103 hosts with restriction-modification (RM) systems are not directly comparable quantitatively. The reason  
104 is that, due to differences in genome size, GC content, and evolution towards restriction site avoidance,  
105 the different genomes have vastly different numbers of recognition sites for a given RM system [27] (S5  
106 Table). In extreme cases such as for type II RM systems and many tested podoviruses, recognition sites  
107 can be completely absent (S5 Table). One might argue that displaying an EOP (of ca. 1) for phage / RM  
108 interactions in the absence of recognition sites is not useful because – just biochemically – a cleavage of  
109 the phage chromosome was barely possible. However, given that the number of these sites is strongly  
110 under selection and part of the phages' strategy to counter their host's defenses, we find it more  
111 appropriate to show all data and highlight for the reader when no recognition sites were present.

112

113

## 114 References (S3 Text)

- 115 1. Hyman P. Phages for Phage Therapy: Isolation, Characterization, and Host Range Breadth.  
116 Pharmaceuticals (Basel). 2019;12(1). Epub 2019/03/14. doi: 10.3390/ph12010035. PubMed PMID:  
117 30862020; PubMed Central PMCID: PMC6469166.
- 118 2. Liu D, Reeves PR. *Escherichia coli* K12 regains its O antigen. Microbiology. 1994;140 ( Pt 1):49-57.  
119 doi: 10.1099/13500872-140-1-49. PubMed PMID: 7512872.
- 120 3. Broecker NK, Barbirz S. Not a barrier but a key: How bacteriophages exploit host's O-antigen as an  
121 essential receptor to initiate infection. Molecular microbiology. 2017;105(3):353-7. Epub 2017/06/16. doi:  
122 10.1111/mmi.13729. PubMed PMID: 28618013.
- 123 4. Prokhorov NS, Riccio C, Zdorovenko EL, Shneider MM, Browning C, Knirel YA, et al. Function of  
124 bacteriophage G7C esterase tailspike in host cell adsorption. Molecular microbiology. 2017;105(3):385-  
125 98. Epub 2017/05/18. doi: 10.1111/mmi.13710. PubMed PMID: 28513100.
- 126 5. Korf IHE, Meier-Kolthoff JP, Adriaenssens EM, Kropinski AM, Nimtz M, Rohde M, et al. Still  
127 Something to Discover: Novel Insights into *Escherichia coli* Phage Diversity and Taxonomy. Viruses.  
128 2019;11(5). doi: 10.3390/v11050454. PubMed PMID: 31109012; PubMed Central PMCID:  
129 PMC6563267.
- 130 6. Hantke K. Compilation of *Escherichia coli* K-12 outer membrane phage receptors - their function  
131 and some historical remarks. FEMS Microbiol Lett. 2020;367(2). Epub 2020/02/06. doi:  
132 10.1093/femsle/fnaa013. PubMed PMID: 32009155.
- 133 7. Bertozzi Silva J, Storms Z, Sauvageau D. Host receptors for bacteriophage adsorption. FEMS  
134 Microbiol Lett. 2016;363(4). Epub 2016/01/13. doi: 10.1093/femsle/fnw002. PubMed PMID: 26755501.
- 135 8. Hay ID, Lithgow T. Filamentous phages: masters of a microbial sharing economy. EMBO reports.  
136 2019;20(6). Epub 2019/04/07. doi: 10.15252/embr.201847427. PubMed PMID: 30952693; PubMed  
137 Central PMCID: PMC6549030.
- 138 9. Doore SM, Fane BA. The microviridae: Diversity, assembly, and experimental evolution. Virology.  
139 2016;491:45-55. Epub 2016/02/14. doi: 10.1016/j.virol.2016.01.020. PubMed PMID: 26874016.
- 140 10. Olsen NS, Forero-Junco L, Kot W, Hansen LH. Exploring the Remarkable Diversity of Culturable  
141 *Escherichia coli* Phages in the Danish Wastewater Environment. Viruses. 2020;12(9). Epub 2020/09/10.  
142 doi: 10.3390/v12090986. PubMed PMID: 32899836; PubMed Central PMCID: PMC7552041.
- 143 11. Mathieu A, Dion M, Deng L, Tremblay D, Moncaut E, Shah SA, et al. Virulent coliphages in 1-year-  
144 old children fecal samples are fewer, but more infectious than temperate coliphages. Nat Commun.  
145 2020;11(1):378. Epub 2020/01/19. doi: 10.1038/s41467-019-14042-z. PubMed PMID: 31953385; PubMed  
146 Central PMCID: PMC6969025.
- 147 12. Sørensen PE, Van Den Broeck W, Kiil K, Jasinskyte D, Moodley A, Garmyn A, et al. New insights  
148 into the biodiversity of coliphages in the intestine of poultry. Sci Rep. 2020;10(1):15220. Epub 2020/09/18.  
149 doi: 10.1038/s41598-020-72177-2. PubMed PMID: 32939020; PubMed Central PMCID:  
150 PMC7494930.
- 151 13. Michniewski S, Redgwell T, Grigonyte A, Rihtman B, Aguilo-Ferretjans M, Christie-Oleza J, et al.  
152 Riding the wave of genomics to investigate aquatic coliphage diversity and activity. Environ Microbiol.  
153 2019;21(6):2112-28. Epub 2019/03/19. doi: 10.1111/1462-2920.14590. PubMed PMID: 30884081;  
154 PubMed Central PMCID: PMC6563131.
- 155 14. Smith R, O'Hara M, Hobman JL, Millard AD. Draft Genome Sequences of 14 *Escherichia coli* Phages  
156 Isolated from Cattle Slurry. Genome Announc. 2015;3(6). Epub 2016/01/02. doi:  
157 10.1128/genomeA.01364-15. PubMed PMID: 26722010; PubMed Central PMCID: PMC64698387.

158 15. Pacifico C, Hilbert M, Sofka D, Dinhopl N, Pap IJ, Aspöck C, et al. Natural Occurrence of *Escherichia*  
159 *coli*-Infecting Bacteriophages in Clinical Samples. *Front Microbiol.* 2019;10:2484. Epub 2019/11/19. doi:  
160 10.3389/fmicb.2019.02484. PubMed PMID: 31736918; PubMed Central PMCID: PMC6834657.

161 16. Demerec M, Fano U. Bacteriophage-Resistant Mutants in *Escherichia Coli*. *Genetics.*  
162 1945;30(2):119-36. Epub 1945/03/01. PubMed PMID: 17247150; PubMed Central PMCID:  
163 PMC6834657.

164 17. Studier FW, Daegelen P, Lenski RE, Maslov S, Kim JF. Understanding the differences between  
165 genome sequences of *Escherichia coli* B strains REL606 and BL21(DE3) and comparison of the *E. coli* B and  
166 K-12 genomes. *Journal of molecular biology.* 2009;394(4):653-80. doi: 10.1016/j.jmb.2009.09.021.  
167 PubMed PMID: 19765592.

168 18. Lopatina A, Tal N, Sorek R. Abortive Infection: Bacterial Suicide as an Antiviral Immune Strategy.  
169 *Annu Rev Virol.* 2020;7(1):371-84. Epub 2020/06/20. doi: 10.1146/annurev-virology-011620-040628.  
170 PubMed PMID: 32559405.

171 19. Yu YT, Snyder L. Translation elongation factor Tu cleaved by a phage-exclusion system.  
172 *Proceedings of the National Academy of Sciences of the United States of America.* 1994;91(2):802-6. Epub  
173 1994/01/18. doi: 10.1073/pnas.91.2.802. PubMed PMID: 8290603; PubMed Central PMCID:  
174 PMC6834657.

175 20. Trojet SN, Caumont-Sarcos A, Perrody E, Comeau AM, Krisch HM. The gp38 adhesins of the T4  
176 superfamily: a complex modular determinant of the phage's host specificity. *Genome Biol Evol.*  
177 2011;3:674-86. Epub 2011/07/13. doi: 10.1093/gbe/evr059. PubMed PMID: 21746838; PubMed Central  
178 PMCID: PMC6834657.

179 21. Mutalik VK, Adler BA, Rishi HS, Piya D, Zhong C, Koskella B, et al. High-throughput mapping of the  
180 phage resistance landscape in *E. coli*. *PLoS biology.* 2020;18(10):e3000877. Epub 2020/10/14. doi:  
181 10.1371/journal.pbio.3000877. PubMed PMID: 33048924; PubMed Central PMCID: PMC6834657.  
182 following competing interests: VKM, AMD, and APA consult for and hold equity in Felix Biotechnology,  
183 Inc.

184 22. Koga M, Otsuka Y, Lemire S, Yonesaki T. *Escherichia coli* *rnIA* and *rnIB* compose a novel toxin-  
185 antitoxin system. *Genetics.* 2011;187(1):123-30. Epub 2010/10/29. doi: 10.1534/genetics.110.121798.  
186 PubMed PMID: 20980243; PubMed Central PMCID: PMC6834657.

187 23. Rangunathan PT, Vanderpool CK. Cryptic-Prophage-Encoded Small Protein DicB Protects  
188 *Escherichia coli* from Phage Infection by Inhibiting Inner Membrane Receptor Proteins. *Journal of*  
189 *bacteriology.* 2019;201(23). Epub 2019/09/19. doi: 10.1128/JB.00475-19. PubMed PMID: 31527115;  
190 PubMed Central PMCID: PMC6834657.

191 24. Shinedling S, Parma D, Gold L. Wild-type bacteriophage T4 is restricted by the lambda *rex* genes.  
192 *Journal of virology.* 1987;61(12):3790-4. Epub 1987/12/01. doi: 10.1128/JVI.61.12.3790-3794.1987.  
193 PubMed PMID: 2960831; PubMed Central PMCID: PMC6834657.

194 25. Jahn M, Vorpahl C, Hubschmann T, Harms H, Müller S. Copy number variability of expression  
195 plasmids determined by cell sorting and Droplet Digital PCR. *Microb Cell Fact.* 2016;15(1):211. doi:  
196 10.1186/s12934-016-0610-8. PubMed PMID: 27993152; PubMed Central PMCID: PMC6834657.

197 26. Pleska M, Qian L, Okura R, Bergmiller T, Wakamoto Y, Kussell E, et al. Bacterial Autoimmunity Due  
198 to a Restriction-Modification System. *Curr Biol.* 2016;26(3):404-9. Epub 2016/01/26. doi:  
199 10.1016/j.cub.2015.12.041. PubMed PMID: 26804559.

200 27. Rusinov IS, Ershova AS, Karyagina AS, Spirin SA, Alexeevski AV. Avoidance of recognition sites of  
201 restriction-modification systems is a widespread but not universal anti-restriction strategy of prokaryotic  
202 viruses. *BMC Genomics.* 2018;19(1):885. Epub 2018/12/12. doi: 10.1186/s12864-018-5324-3. PubMed  
203 PMID: 30526500; PubMed Central PMCID: PMC6834657.
