# Supplementary material for: Systematic exploration of Escherichia coli phage-host interactions with the BASEL phage collection
Source: bioRxiv or medRxiv preprint supplement (doi:10.1101/2021.03.08.434280), 2021-03-15
Supplement: Supplementary file [file media-7.pdf]

Figure S1

**A**

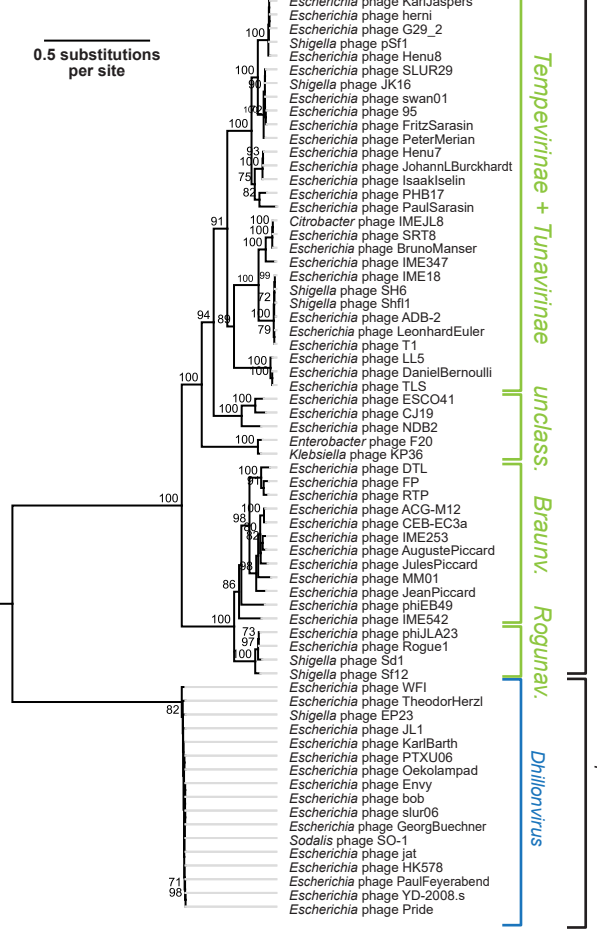

**C**

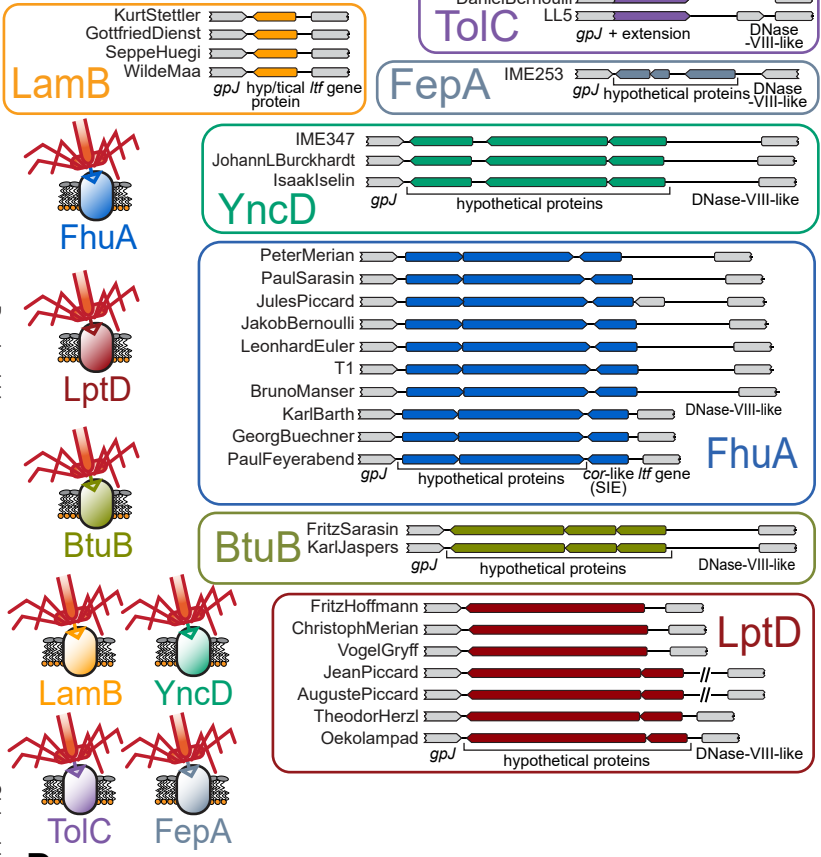

**D**

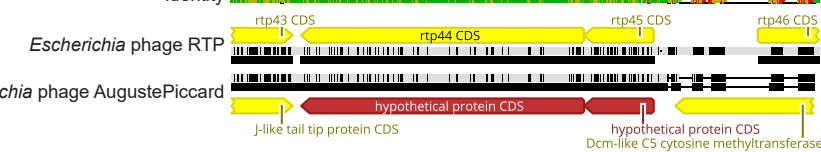

**B**

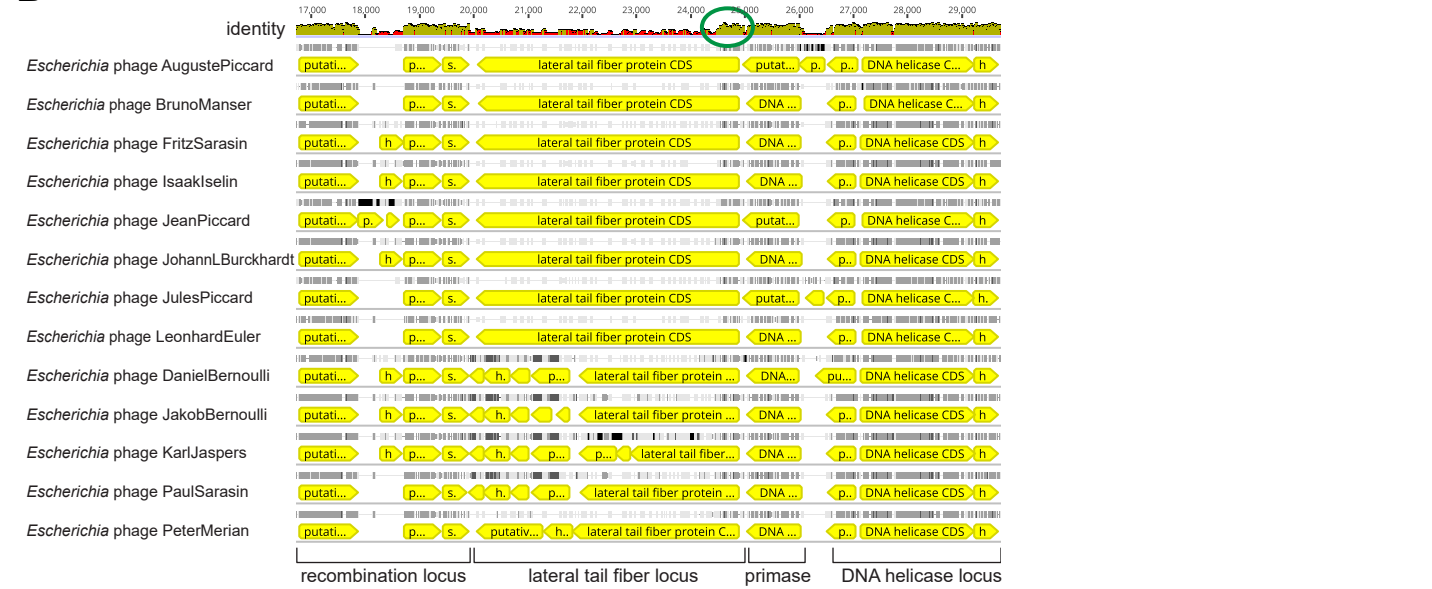

## S1 Figure. Supplemental data for Figs 4 and 5.

(A) Maximum-Likelihood phylogeny of *Drexelviriidae* and the *Dhillonvirus* genus of *Siphoviridae* based on several core genes with bootstrap support of branches shown if  $> 70/100$ . It is clearly apparent that *Drexelviriidae* are split into two major clades, one formed by *Braunvirinae* and *Rogunavirinae* and another one formed by *Tempevirinae*, *Tunavirinae*, plus a few other groups. Given that the phylogenies strongly agree on all major branches, the root of the *Drexelviriidae* phylogeny shown in Fig 4B was placed between these two major clades. (B) The locus encoding lateral tail fibers was analyzed in a sequence alignment of the thirteen *Drexelviriidae* phage genomes of the BASEL collection (see *Materials and Methods*). It is clearly visible that the upstream and downstream regions (encoding genes involved in recombination as well as primase / helicase proteins for genome replication) are highly conserved and fully syntenic, with exception of small insertions in a few sequences. Conversely, only the most 5' end of the largest lateral tail fiber protein gene is very similar among all analyzed genomes (green circle), while the rest shows neither synteny nor clear homology across all genomes. (C) The *bona fide* RBP loci downstream of the *gpJ* homolog are shown for all small siphoviruses (*Drexelviriidae* and *Siphoviridae* of *Dhillonvirus*, *Nonagvirus*, and *Seuratvirus* genera) where we had experimentally determined the terminal receptor (together with selected representatives where previous work had determined the receptor specificity). (D) The *bona fide* RBP locus of *E. coli* phage RTP was aligned to the homologous locus of phage AugustePiccard (Bas01) as described in *Materials and Methods*. For the region comprising *rtp44* and *rtp45* of phage RTP, the pairwise identity of the two nucleotide sequences is ca. 93%.

Figure S2

A

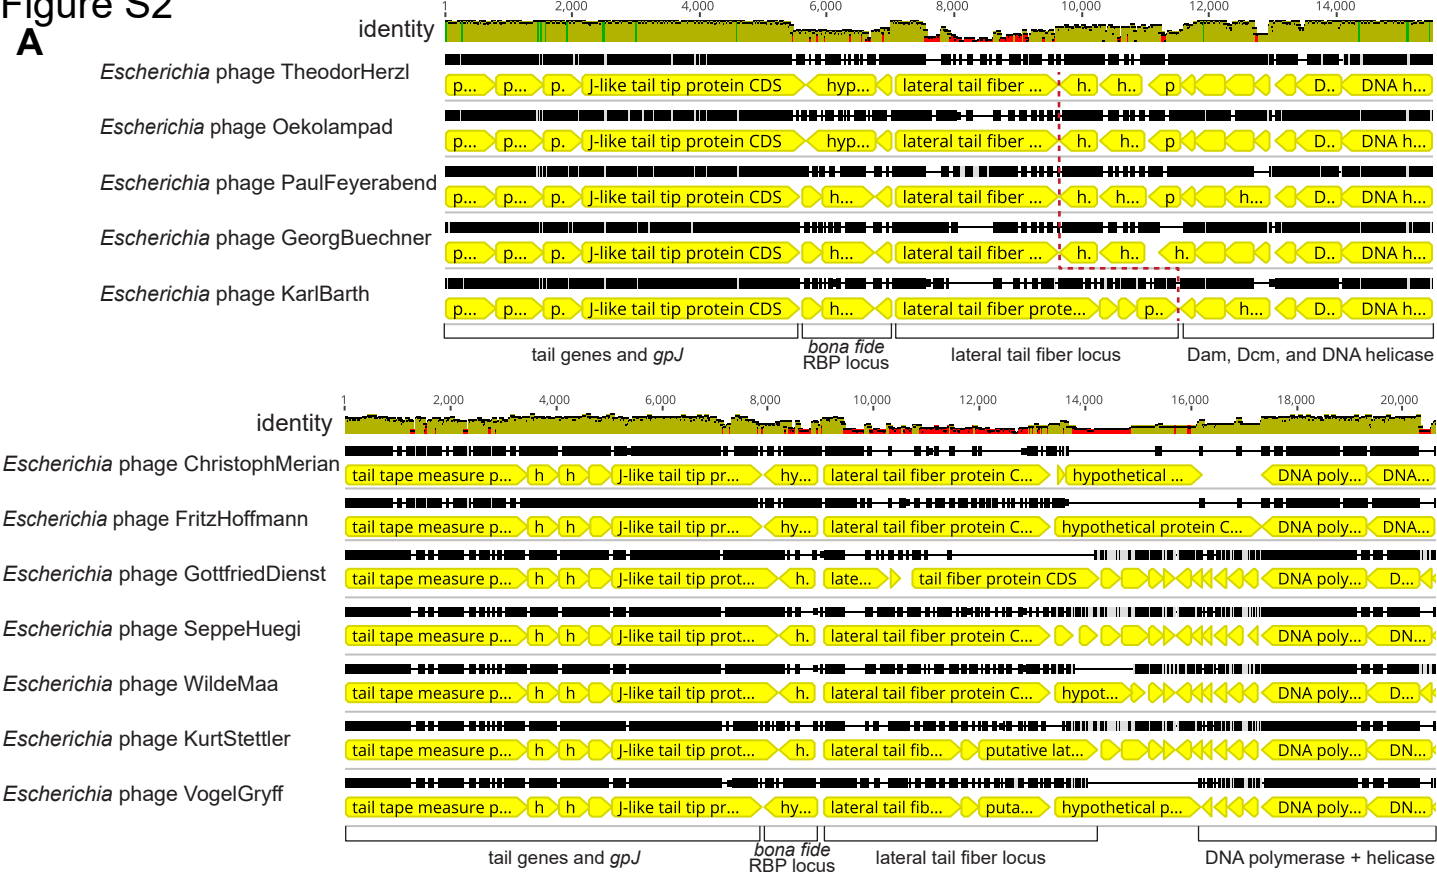

B

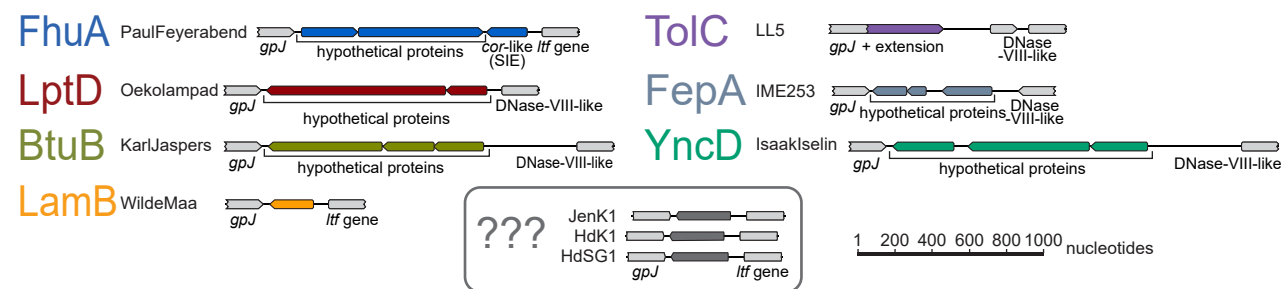

## S2 Figure. Supplemental data for Fig 6.

(A) The locus encoding lateral tail fibers was analyzed in sequence alignments of the five *Dhillonvirus* phage genomes of the BASEL collection (top) and the seven *Nonagvirus* + *Seuratvirus* phage genomes of the BASEL collection (bottom) as described in *Materials and Methods*. In both cases two clear dips in overall sequence similarity are obvious, once at the *bona fide* RBP locus and then at the lateral tail fiber locus downstream of the far 5' end of its first gene. (B) Schematic comparison of representative *bona fide* RBP loci as shown in S1C Fig to the corresponding allele of *E. coli* phages JenK1, HdK1, and HdsG1 that does not match clearly match any of them.



Figure S3

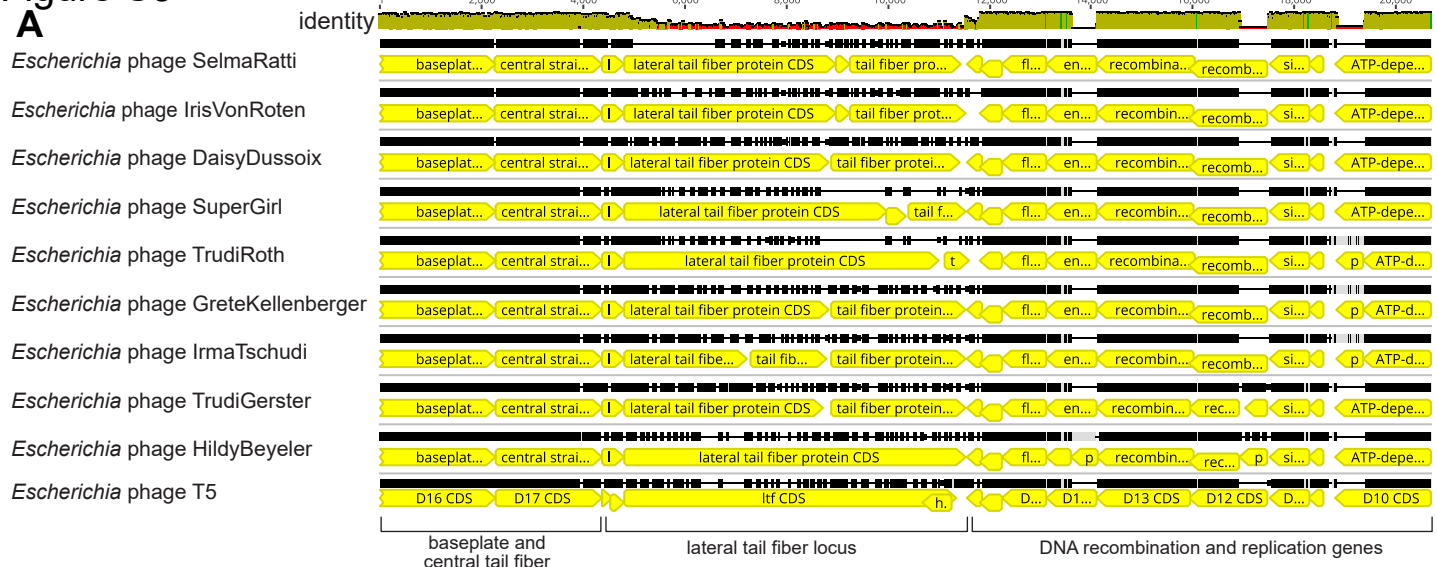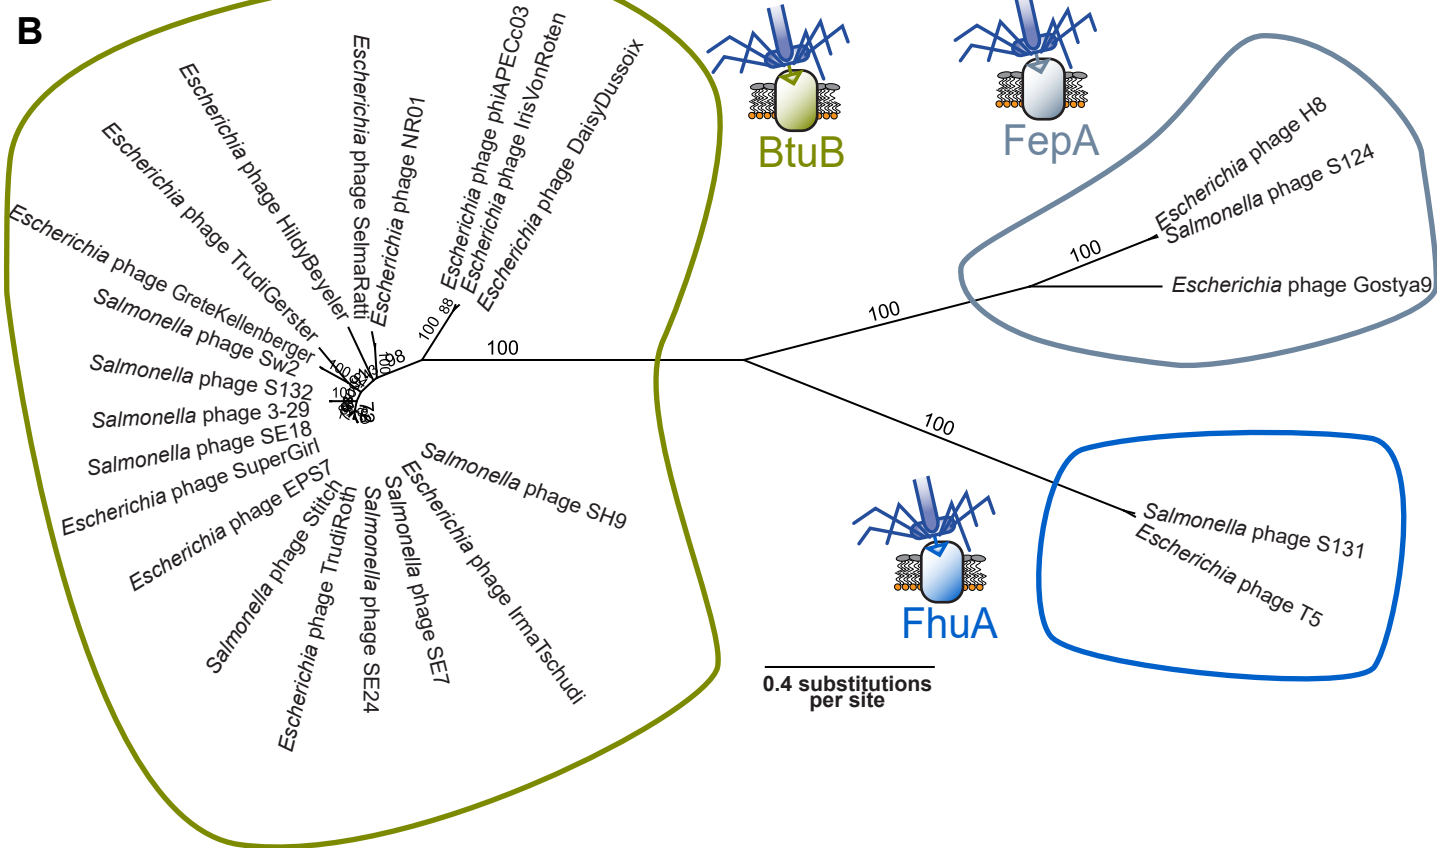

### **S3 Figure. Supplemental data for Fig 7.**

**(A)** The locus encoding lateral tail fibers was analyzed in a sequence alignment of the *Demereviridae: Markadamsvirinae* phage genomes of the BASEL collection as described in *Materials and Methods*. Sequence identity is high upstream and downstream of the lateral tail fiber locus (with exception of presence / absence of a few putative homing endonucleases) but drops considerably at the lateral tail fiber genes. Note that, as described previously, the lateral tail fibers can either be composed of a single large polypeptide or by two (or more) separate proteins [51, 60]. The same diversity in architecture of lateral tail fibers can also be seen at the corresponding loci of small siphoviruses (S1B and S2A Figs).

**(B)** The illustration shows a phylogeny of the RBPs of all *Markadamsvirinae* phages shown in Fig 7B. Briefly, the RBP genes of all genomes (invariably encoded directly upstream of the terminase genes) were translated, aligned, and then used to generate a phylogeny as described in *Materials and Methods*. Three clear clusters emerge, one including all phages known to bind BtuB (left), one including all phages known to bind FepA (top right), and one including all phages known to bind FhuA (bottom right). Based on similar analyses by others [62], we conclude that the position of RBPs in these clusters is predictive of terminal receptor specificity of the phages encoding them.

Figure S4

**A**

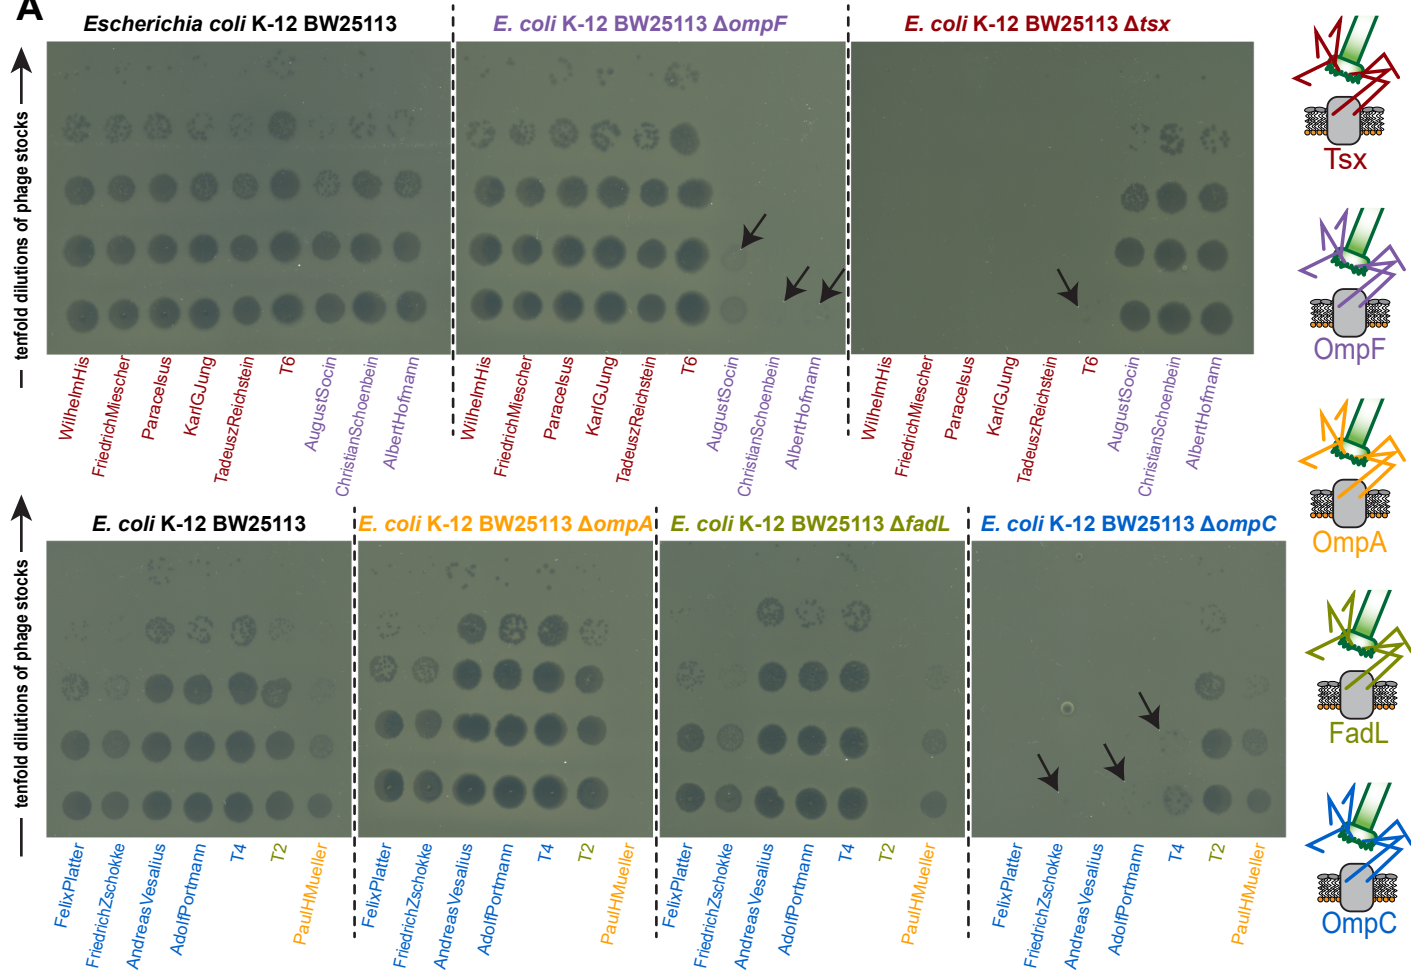

**B**

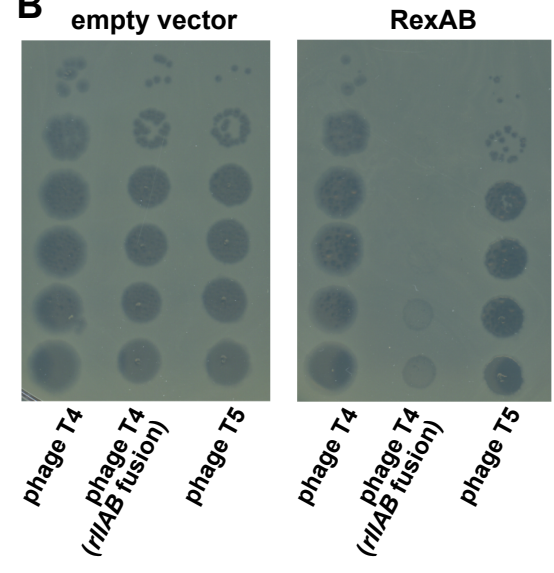

**C**

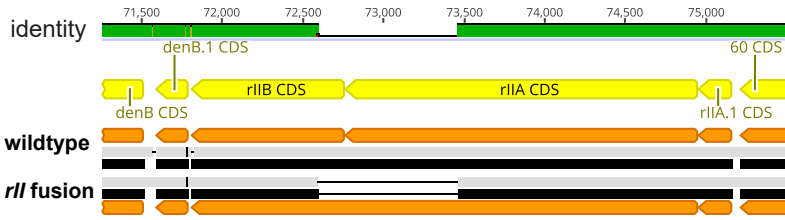

## S4 Figure. Supplemental data for Fig 8.

(A) Top agar assays with different surface protein mutants of the KEIO collection in comparison to the ancestral *E. coli* K-12 BW25113 strain were performed with serial tenfold dilutions of all *Tevenvirinae* phages used in this study (undiluted high-titer stocks at the bottom and increasingly diluted samples towards the top). The phages show strongly or totally abolished growth on each one of the mutants which identifies the primary receptor of each phage (also indicated by the color code highlighted on the right). (B) Top agar assays of reference strain *E. coli* K-12  $\Delta$ RM carrying empty vector pBR322\_ $\Delta$ Ptet or pAH213\_rexAB were performed with serial tenfold dilutions of phage T4 wildtype, a T4 variant encoding an apparently hypomorphic *rIIAB* fusion (see (C)), and phage T5 (as control). The *rIIAB* mutant of phage T4 is unable to form plaques on the *rexAB*-expressing host and shows only “lysis from without” [98], while the T4 wildtype and phage T5 are not affected. (D) A T4 phage mutant was erroneously obtained from a culture collection instead of the wildtype and encoded a peculiar *rII* allele with fusion of the *rIIA* and *rIIB* open reading frames (as revealed by whole-genome sequencing). Since such a mutant seems unlikely to arise spontaneously during shipping, we find it likely that this phage strain is related to the *rIIAB* fusion mutants employed for discovery of the triplet nature of the genetic code that were once commonly used [concisely reviewed in reference 149, 150]. Notably, position and size of the deletion fusing *rIIA* and *rIIB* are indistinguishable from the sketch drawn by Benzer and Champe for the *rIIAB* fusion mutant *r1589* which was used in the aforementioned work [151]. Unlike T4 wildtype, the *rIIAB* fusion mutant is susceptible to *rexAB* when ectopically expressed from a plasmid vector (see (C)) and therefore validates functionality of the *rexAB* construct.

# Figure S5

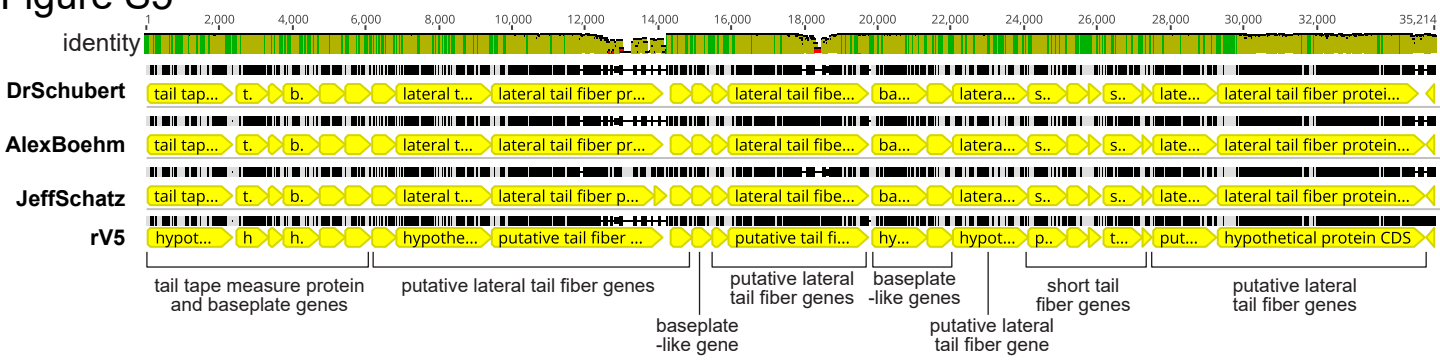

## **S5 Figure. Supplemental data for Fig 9.**

The illustration shows a sequence alignment of the locus encoding lateral tail fiber genes in phage rV5 and new isolates DrSchubert, AlexBoehm, and JeffSchatz that broadly cover the phylogenetic range of this genus (Fig 9B). It extends from the tail tape measure protein of phage rV5 (*gp49*) to the last large lateral tail fiber gene (*gp27*) [70, 71]. Note that most genes are highly conserved including the lateral tail fiber component with sugar deacetylase domain (compare Fig 9D; around position 8'000 in this alignment) or the short tail fiber locus (compare Fig 9E). Only the three largest lateral tail fiber genes show considerable allelic variation that is very strong for two of them (positions 10'000-14'000 and 16'000-19'000) and moderate for another one (positions 29'000 to 34'000).
